# Supplementary material
Source: PubMed Central journal article supplement (PMC5645074)
Supplement: NIHMS909349-supplement-Supplementary_Materials.pdf [file NIHMS909349-supplement-Supplementary_Materials.pdf]

**Supporting Information for:**

**Synthetic Lectin Arrays for the Detection and Discrimination of  
Cancer Associated Glycans and Cell Lines**

**Kevin L. Bicker,<sup>b</sup> Jing Sun,<sup>a</sup> Morgan Harrell,<sup>a</sup> Yu Zhang,<sup>a</sup> Maria M. Pena,<sup>a</sup> Paul R. Thompson\*<sup>b</sup>  
and John J. Lavigne\*<sup>a</sup>**

<sup>a</sup> Department of Chemistry & Biochemistry, University of South Carolina, 631 Sumter Street, Columbia, SC, USA 29208. Fax: (803)-777-9521; Tel: (803)-777-5264; E-mail: JLavigne@chem.sc.edu

<sup>b</sup> Department of Chemistry, The Scripps Research Institute, Scripps Florida, 120 Scripps Way, Jupiter, Florida, USA 33458. Fax: (561)-228-3050; Tel: (561)-228-2860; E-mail: PThomps@scripps.edu

**Methods**

*SL Library and Hit Validation.* SL library synthesis, screening, sequencing, and SL hit validation have already been described.<sup>1</sup>

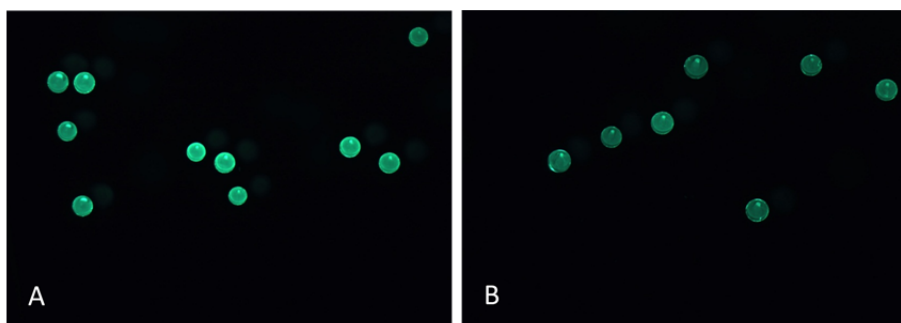

**Figure S1.** Representative images of an SL screening. SL5 (A) and the library (B) after binding with FITC-PSM.

*Chemicals.* FITC and FITC-streptavidin were purchased from Sigma-Aldrich (Milwaukee, WI). Fmoc-protected amino acids, O-Benzotriazole-N,N,N',N'-tetramethyl-uronium-hexafluorophosphate (HBTU), and rink amide resin were purchased from Novabiochem Corp (Gibbstown, NJ). Biotin labeled glycans were purchased from GlycoTech Corp. (Gaithersburg, MD). Human serum was purchased from PAA Laboratories, Inc. (Dartmouth, MA) and cell growth media and supplies were purchased from VWR International, LLC (West Chester, PA). All other chemicals were purchased from Acros Organics (Morris Plains, NJ) and used without further purification.

*Microscopy.* All fluorescent images were taken using a Leica MZ 16F microscope equipped with a GFP filter set (excitation 450-490 nm; emission filter 500-550 nm), and a QImaging

MicroPublisher 5.0 RTV digital camera. The images were analyzed with Adobe Photoshop, using the elliptical marquee tool to select the entire bead, obtaining luminosity values that represent the fluorescent intensity of individual beads. High average luminosity values correspond to brighter beads that presumably bind strongly to the analyte under study.

*FITC-Labeled Cell Membrane Extracts.* Cells were grown to ~80% confluence, at which point they were scraped and collected from four T75 flasks and washed with PBS. The Qiagen Plasma Membrane Protein Kit (Qiagen, Inc., Valencia, CA) was used to isolate the cell plasma membrane proteins and glycoproteins. After adjusting the pH of the resulting solution to 8.8, 28  $\mu$ g of FITC (71.9 nmol) was added in DMF and the solution tumbled gently at 37 °C for 1 h. This solution was transferred to a 3.5 kDa Slide-A-Lyzer cassette (Thermo Fisher Scientific, Inc., Rockford, IL) and dialyzed against Screening Buffer (500 mL) at 4 °C for 6 h, changing the buffer twice more.

*SL Screening in Human Serum.* SL2 and SL5 were screened using the methods described previously<sup>1</sup> in the presence of human serum. Briefly, 0.1 mg/mL FITC-tagged analytes (i.e., OVA, BSM, PSM, and BSA) in varying concentrations of Screening Buffer containing diluted human serum (i.e., 0, 25, 50, and 95%), uniformly containing 1% BSA were added to individual tubes of SL resin (2 mg) and incubated at 23 °C for 16 h. Library resin was screened in parallel to act as a control. Resin was subsequently washed, imaged, and analyzed as previously described (**Figure S2A and S2B**).<sup>1</sup>

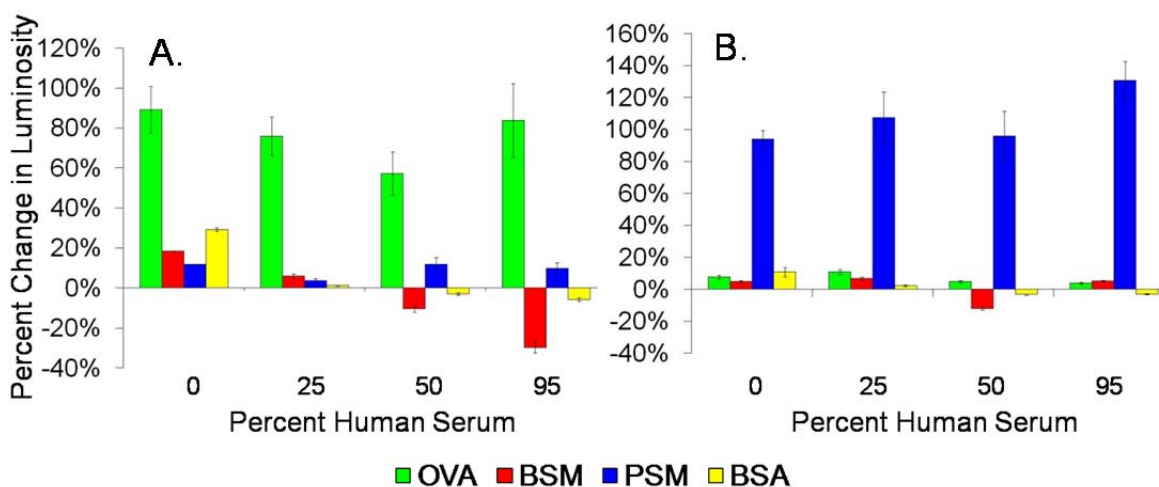

**Figure S2.** Plots of the relative percent change in luminosity for SL2 (A.) and SL5 (B.) in varying amounts of human serum, indicating that these SLs maintain their selectivity in complex media.

*Human Serum Screening Controls.* Parallel screenings to those done to test the selectivity of SL2 in human serum were done without any fluorescent glycoprotein to assure no component in the serum produced any appreciable background fluorescence (**Figure S3**).

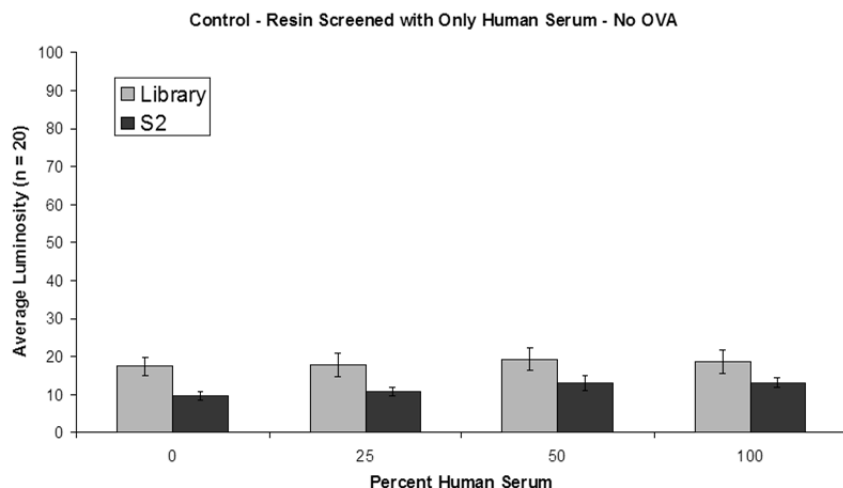

**Figure S3.** Human serum screening controls showing that the serum contributes no appreciable fluorescence.

*Determination of Bead-Based SL5  $K_d$ .* Portions of SL5 (2 mg) were prepared and screened as described previously with varying concentrations of FITC-PSM (i.e., 0, 0.001, 0.005, 0.01, 0.05, 0.1, 0.25, 0.5, 1.0, 2.0, and 4.0  $\mu\text{M}$ ) for 6 h in Screening Buffer. Resin was subsequently washed, imaged, and analyzed to acquire average luminosities. This data was plotted as fraction bound versus FITC-PSM concentration and fit to a single site ligand binding model using GraFit 5.0.11 (**Figure S4**).<sup>2</sup>

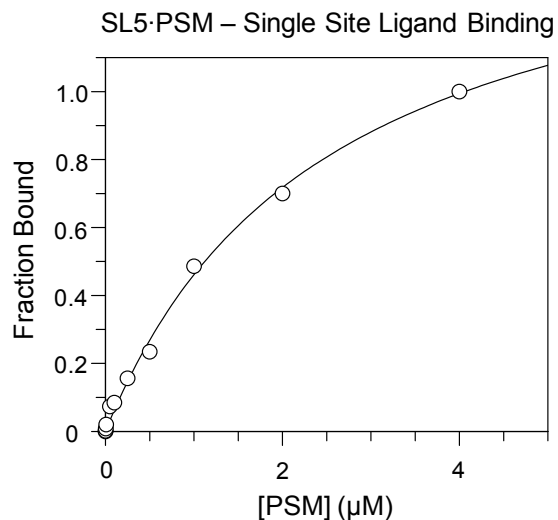

**Figure S4.** Data for treatment of bead based SL5 with varying concentrations of FITC-PSM is fit to a single site ligand binding model using GraFit to obtain a  $K_d$  of  $2.5 \pm 0.29$   $\mu\text{M}$  as an upper limit.

*Synthesis of FITC-SL5.* A peptide of the sequence Ac-RAD\*TRVD\*VBBRMK\*-resin, where B is beta-alanine, **D\*** denotes a boronic acid functionalized Dab, and **K\*** denotes a FITC functionalized Lys, was synthesized on rink amide resin (200-400 mesh; 0.71 mmol/g substitution) using Fmoc strategies.<sup>1</sup> After peptide synthesis, the N-terminus was acetylated in 10 mL of  $\text{CH}_2\text{Cl}_2$  containing 5% acetic anhydride and 5% pyridine. The attachment of the phenylboronic acid moieties then proceeded as previously described.<sup>1</sup> Fmoc-Lys(Mtt)-OH was used on the C-terminus to provide an orthogonal handle to attach the fluorophore. The Mtt protecting group was removed by treating the resin 5 times with 15 mL of 1% TFA in  $\text{CH}_2\text{Cl}_2$ , 5 min each, washing with DCM between treatments. Resin was then treated with FITC (1.5 eq, 67.6 mg, 0.1737 mmol) in 10 mL of 5% NMM in DMF 2 h with tumbling. Resin was subsequently washed with DMF, MeOH, and DMF and cleaved from the resin with 95% TFA, 2.5% water, 2.5% TIS for 6 h. This solution was collected, the TFA bubbled off with nitrogen gas, the peptide precipitated by diethyl ether, and purified by preparative HPLC on a C18 column.

*Fluorescence Polarization.*<sup>3</sup> All fluorescence polarization (FP) work was performed on a Molecular Devices, SpectraMax M5 plate reader in 384 well microtiter plates (MTPs), exciting at 480 nm, reading the emission at 525 nm, and using a dichromatic cut-off of 495 nm. Note that all assays were performed in triplicate, in Screening Buffer containing 1% Pluronic F127, with a

sample volume of 30  $\mu\text{L}$ . This assay was first set up at four different concentrations of FITC-SL5 (0.05, 0.5, 5.0, and 50.0  $\mu\text{M}$ ), each treated with 10 different concentrations of PSM (0, 0.001, 0.01, 0.05, 0.1, 0.2, 0.5, 1.0, 2.0, 5.0, and 10  $\mu\text{M}$ ) for 6 h, taking readings every 30 min. This work identified the optimal FITC-SL5 concentration (0.5  $\mu\text{M}$ ) and incubation time (1.5 h), which were used for all subsequent FP assays. This assay was then performed with varying concentrations of OVA (0, 0.1, 1.0, 3.0, 10, 30, 100, 300, 900, 1500, and 2250  $\mu\text{M}$ ), BSM (0, 0.1, 1.0, 3.0, 5.0, 10, 30, 57.2  $\mu\text{M}$ ), and BSA (0, 0.1, 1.0, 5.0, 10, 30, 100, 500, 800, 1046  $\mu\text{M}$ ) (**Figure S5**).

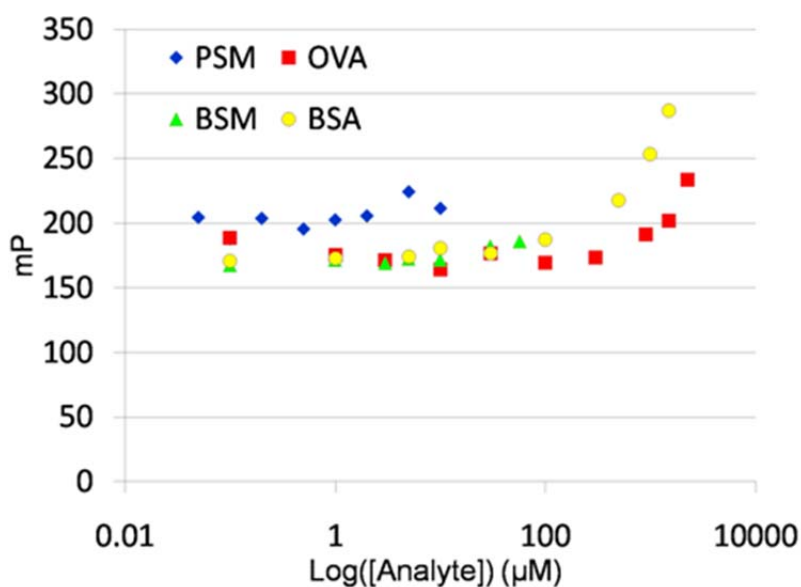

**Figure S5.** Plot of the fluorescence polarization assay used to monitor binding between monovalent FITC-SL5 and various analytes. Note that a response is only observed at higher concentrations of analyte, indicating that multivalency is an important component for strong binding with bead based SLs.

*Glycan Competition Studies.* Portions of Dab Fixed Library and SL resin (2 mg) were prepared and screened as previously described with their respective FITC-glycoprotein (0.1 mg/mL; 1 mL) in PBSG doped with varying concentrations (i.e. 0, 0.001, 0.01, 0.10, 1.0, 10, 100, and 1000 mM) of glycan (fructose, mannose, galactose, and N-acetylglucosamine for SL2; fructose, galactose, N-acetylglucosamine, N-acetylgalactosamine, fucose, and sialic acid for SL5). Resin was subsequently washed, imaged, and analyzed as described above.

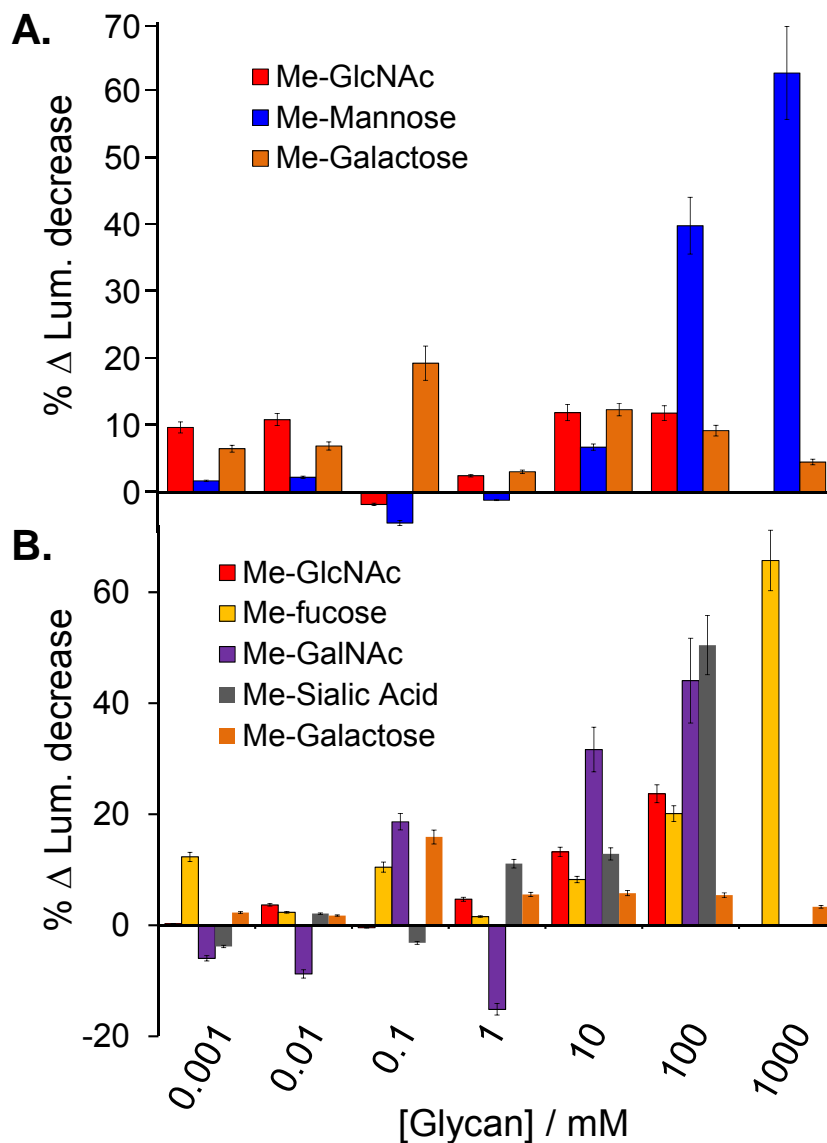

**Figure S6.** Percent change in luminosity for the non-reducing glycan competition studies used to explore the SL2-OVA (**A**) and SL5-PSM (**B**) binding interactions (analyte identification indicated in the legends above). Error bars represent the standard error of the percent change relative to the control as this propagated uncertainty is based on the variance between replicate measurements for the sample and control reference.

*SL Based Array for Glycan Differentiation.* Five separate portions of each SL used in the array (2 mg; SLs 1, 3, 4, and 5) were prepared as described previously<sup>1</sup> and each portion subsequently treated with 0.5 mL of a premixed solution of 1  $\mu$ M FITC-streptavidin and 4  $\mu$ M glycan (i.e., biotin tagged TF antigen, Le<sup>a</sup>, Le<sup>x</sup>, sLe<sup>a</sup>, or sLe<sup>x</sup>) in Screening Buffer (100 mM NaH<sub>2</sub>PO<sub>4</sub>, 150 mM NaCl, 10% glycerol, pH 7.2) for 6 h at 23 °C with gentle tumbling. Resin was washed,

imaged, and analyzed as described previously.<sup>1</sup> Luminosity data was analyzed using commercially available feature selection algorithms. Systat 11.00.01 was used to carry out all linear discriminant analysis (LDA) determinations and to obtain the general and leave-one-out cross validation classification accuracies.<sup>4</sup> Statistica was used as a graphical program and for training/test set analysis with data sets randomly assigned from the Normal Distribution using Excel.<sup>5</sup>

### Group Frequencies

| Lea | Lex | TF | sLea | sLex |
|-----|-----|----|------|------|
| 15  | 15  | 15 | 15   | 15   |

### Group means

|          | Lea   | Lex   | TF    | sLea  | sLex  |
|----------|-------|-------|-------|-------|-------|
| VAR00002 | 0.84  | 0.71  | 0.694 | 0.874 | 0.638 |
| VAR00003 | 0.822 | 0.837 | 0.766 | 0.93  | 0.604 |
| VAR00004 | 0.723 | 0.915 | 0.782 | 0.787 | 0.763 |
| VAR00005 | 0.768 | 0.909 | 0.643 | 0.892 | 0.57  |

### Between groups F-matrix -- df = 4 67

|      | Lea     | Lex     | TF      | sLea    | sLex |
|------|---------|---------|---------|---------|------|
| Lea  | 0       |         |         |         |      |
| Lex  | 47.736  | 0       |         |         |      |
| TF   | 49.662  | 68.299  | 0       |         |      |
| sLea | 22.861  | 47.964  | 120.103 | 0       |      |
| sLex | 127.918 | 144.103 | 27.151  | 242.098 | 0    |

### Wilks' lambda

|            |         |      |        |          |
|------------|---------|------|--------|----------|
| Lambda =   | 0.009   | df = | 4 4 70 |          |
| Approx. F= | 47.0237 | df = | 16 205 | prob = 0 |

### Classification functions

|          | Lea      | Lex      | TF       | sLea     | sLex    |
|----------|----------|----------|----------|----------|---------|
| CONSTANT | -525.027 | -554.428 | -408.568 | -635.707 | -323.33 |
| VAR00002 | 501.254  | 435.076  | 408.271  | 529.412  | 369.486 |
| VAR00003 | 298.742  | 289.374  | 275.866  | 336.666  | 211.082 |
| VAR00004 | 121.903  | 183.022  | 163.575  | 127.759  | 171.917 |
| VAR00005 | 380.067  | 425.913  | 297.402  | 438.963  | 261.963 |

| Included |             |           | Excluded |            |           |
|----------|-------------|-----------|----------|------------|-----------|
| Variable | F-to-remove | Tolerance | Variable | F-to-enter | Tolerance |
| VAR00002 | 21.87       | 0.9684    |          |            |           |
| VAR00003 | 12.97       | 0.975306  |          |            |           |
| VAR00004 | 8.16        | 0.937653  |          |            |           |
| VAR00005 | 35.1        | 0.921545  |          |            |           |

**Classification matrix (cases in row categories classified into columns)**

|              | Lea       | Lex       | TF        | sLea      | sLex      | %correct   |
|--------------|-----------|-----------|-----------|-----------|-----------|------------|
| Lea          | 14        | 0         | 0         | 1         | 0         | <b>93</b>  |
| Lex          | 0         | 15        | 0         | 0         | 0         | <b>100</b> |
| TF           | 0         | 0         | 15        | 0         | 0         | <b>100</b> |
| sLea         | 0         | 0         | 0         | 15        | 0         | <b>100</b> |
| sLex         | 0         | 0         | 0         | 0         | 15        | <b>100</b> |
| <b>Total</b> | <b>14</b> | <b>15</b> | <b>15</b> | <b>16</b> | <b>15</b> | <b>99</b>  |

**Jackknifed classification matrix**

|              | Lea       | Lex       | TF        | sLea      | sLex      | %correct   |
|--------------|-----------|-----------|-----------|-----------|-----------|------------|
| Lea          | 13        | 0         | 0         | 2         | 0         | <b>87</b>  |
| Lex          | 0         | 14        | 0         | 1         | 0         | <b>93</b>  |
| TF           | 0         | 0         | 15        | 0         | 0         | <b>100</b> |
| sLea         | 1         | 0         | 0         | 14        | 0         | <b>93</b>  |
| sLex         | 0         | 0         | 0         | 0         | 15        | <b>100</b> |
| <b>Total</b> | <b>14</b> | <b>14</b> | <b>15</b> | <b>17</b> | <b>15</b> | <b>95</b>  |

**Eigenvalues**

17.855      3.182      0.403      0.002

**Canonical correlations**

0.973      0.872      0.536      0.043

**Cumulative proportion of total dispersion**

0.833      0.981      1      1

**Wilks' lambda**

Lambda = 0.009  
 Approx.F= 47.098      df = 16, 205      p-tail = 0

**Pillai's trace**

trace = 1.997  
 Approx.F= 17.451      df = 16, 280      p-tail = 0



### Lawley-Hotelling trace

trace = 21.442  
Approx.F= 87.779                      df = 16, 262                      p-tail = 0

### Canonical discriminant functions

|          | 1       | 2       | 3       | 4       |
|----------|---------|---------|---------|---------|
| Constant | -27.507 | 4.208   | 4.121   | -12.817 |
| VAR00002 | 13.356  | 12.801  | 6.235   | 12.552  |
| VAR00003 | 9.595   | 3.079   | -17.515 | -3.183  |
| VAR00004 | -3.378  | -11.562 | -4.343  | 14.044  |
| VAR00005 | 16.602  | -9.367  | 11.256  | -6.933  |

### Canonical discriminant functions -- standardized by within variances

|          | 1      | 2      | 3      | 4      |
|----------|--------|--------|--------|--------|
| VAR00002 | 0.585  | 0.56   | 0.273  | 0.55   |
| VAR00003 | 0.475  | 0.152  | -0.867 | -0.158 |
| VAR00004 | -0.184 | -0.628 | -0.236 | 0.763  |
| VAR00005 | 0.746  | -0.421 | 0.505  | -0.311 |

### Canonical scores of group means

|      | 1      | 2      | 3      | 4      |
|------|--------|--------|--------|--------|
| Lea  | 1.913  | 1.941  | 0.464  | -0.058 |
| Lex  | 2.007  | -3.205 | 0.138  | -0.021 |
| TF   | -2.853 | 0.379  | -1.124 | -0.014 |
| sLea | 5.251  | 0.812  | -0.093 | 0.061  |
| sLex | -6.319 | 0.073  | 0.614  | 0.032  |

*Cell Culture.* All cells were grown in monolayers in T75 flasks at 37 °C in 5% CO<sub>2</sub> and 95% air. HCT116 and LoVo human colorectal carcinoma cells were grown in Roswell Park Memorial Institute (RPMI) media supplemented with 10% fetal bovine serum (FBS) and 1% antibiotic/antimycotic. HT29 human colorectal carcinoma cells and MCF7 human breast cancer cells were grown in Dulbecco's Modified Eagle Medium (DMEM) supplemented with 10% FBS and 1% antibiotic/antimycotic. NIH/3T3 murine fibroblast cells were grown in DMEM supplemented with 10% neonatal calf serum and 1% antibiotic/antimycotic.

*SL Based Array for Cell Differentiation.* SL resin was prepared as described for the glycan array and each portion subsequently treated with a 50-fold dilution of each FITC-cell membrane extract in Screening Buffer for 6 h at 23 °C with gentle tumbling. Resin was washed, imaged,

and analyzed as described above. To account for differences in fluorescent labeling and protein concentration, each individual SL luminosity for one cell type, was divided by the highest SL luminosity for that cell type. Luminosity data was analyzed using commercially available feature selection algorithms. Systat 11.00.01 was used to carry out all linear discriminant analysis (LDA) determinations and to obtain the general and leave-one-out cross validation classification accuracies.<sup>4</sup> Statistica was used as a graphical program and for training/test set analysis with data sets randomly assigned from the Normal Distribution using Excel.<sup>5</sup>

### Single layered analysis: SL-Array responding to all 7 cell lines

In this initial analysis, the data for each normalized cell line was considered individually to afford 7 classes of analytes.

#### Group Frequencies

|         |       |          |           |        |       |      |
|---------|-------|----------|-----------|--------|-------|------|
| 3T3/NIH | CT-26 | CT-26-F1 | CT-26-FL3 | HCT116 | HT-29 | LoVo |
| 40      | 40    | 40       | 40        | 80     | 40    | 60   |

#### Group means

|          | 3T3/NIH | CT-26 | CT-26-F1 | CT-26-FL3 | HCT116 | HT-29 | LoVo  |
|----------|---------|-------|----------|-----------|--------|-------|-------|
| VAR00002 | 0.947   | 0.56  | 0.693    | 0.773     | 0.554  | 0.789 | 0.446 |
| VAR00003 | 0.819   | 0.795 | 0.419    | 0.489     | 0.601  | 0.791 | 0.408 |
| VAR00004 | 0.614   | 0.915 | 0.911    | 0.911     | 0.797  | 0.801 | 0.822 |
| VAR00005 | 0.839   | 0.901 | 0.849    | 0.739     | 0.863  | 0.592 | 0.451 |

#### Between groups F-matrix -- df = 4 330

|           | 3T3/NIH | CT-26   | CT-26-F1 | CT-26-FL3 | HCT116  | HT-29  | LoVo |
|-----------|---------|---------|----------|-----------|---------|--------|------|
| 3T3/NIH   | 0       |         |          |           |         |        |      |
| CT-26     | 220.442 | 0       |          |           |         |        |      |
| CT-26-F1  | 285.772 | 239.399 | 0        |           |         |        |      |
| CT-26-FL3 | 226.529 | 282.742 | 27.097   | 0         |         |        |      |
| HCT116    | 250.841 | 73.187  | 120.634  | 185.571   | 0       |        |      |
| HT-29     | 84.871  | 230.024 | 220.7    | 125.836   | 254.145 | 0      |      |
| LoVo      | 507.747 | 500.279 | 148.108  | 110.028   | 388.655 | 256.22 | 0    |

#### Wilks' lambda

|            |          |      |          |
|------------|----------|------|----------|
| Lambda =   | 0.0034   | df = | 4 6 333  |
| Approx. F= | 196.8729 | df = | 24 1152  |
|            |          |      | prob = 0 |

### Classification functions

|          | 3T3/NIH  | CT-26    | CT-26-F1 | CT-26-FL3 | HCT116   | HT-29    | LoVo    |
|----------|----------|----------|----------|-----------|----------|----------|---------|
| CONSTANT | -156.695 | -183.161 | -120.806 | -117.974  | -134.333 | -136.044 | -73.862 |
| VAR00002 | 36.702   | -39.1    | 12.244   | 34.36     | -24.991  | 35.854   | 10.066  |
| VAR00003 | 179.783  | 192.498  | 88.468   | 96.021    | 145.102  | 165.169  | 81.688  |
| VAR00004 | 52.271   | 94       | 102.48   | 103.078   | 82.224   | 84.144   | 98.057  |
| VAR00005 | 113.638  | 161.204  | 116.463  | 87.462    | 145.873  | 70.721   | 56.335  |

| Included |             |           | Excluded |            |           |
|----------|-------------|-----------|----------|------------|-----------|
| Variable | F-to-remove | Tolerance | Variable | F-to-enter | Tolerance |
| VAR00002 | 191.56      | 0.689043  |          |            |           |
| VAR00003 | 255.33      | 0.910461  |          |            |           |
| VAR00004 | 50.4        | 0.970885  |          |            |           |
| VAR00005 | 278.88      | 0.702439  |          |            |           |

### Classification matrix (cases in row categories classified into columns)

|              | 3T3/NIH   | CT-26     | CT-26-F1  | CT-26-FL3 | HCT116    | HT-29     | LoVo      | %correct   |
|--------------|-----------|-----------|-----------|-----------|-----------|-----------|-----------|------------|
| 3T3/NIH      | 40        | 0         | 0         | 0         | 0         | 0         | 0         | <b>100</b> |
| CT-26        | 0         | 39        | 0         | 0         | 1         | 0         | 0         | <b>98</b>  |
| CT-26-F1     | 0         | 0         | 33        | 7         | 0         | 0         | 0         | <b>83</b>  |
| CT-26-FL3    | 0         | 0         | 2         | 38        | 0         | 0         | 0         | <b>95</b>  |
| HCT116       | 0         | 9         | 3         | 0         | 67        | 1         | 0         | <b>84</b>  |
| HT-29        | 0         | 0         | 0         | 1         | 0         | 39        | 0         | <b>98</b>  |
| LoVo         | 0         | 0         | 0         | 0         | 0         | 0         | 60        | <b>100</b> |
| <b>Total</b> | <b>40</b> | <b>48</b> | <b>38</b> | <b>46</b> | <b>68</b> | <b>40</b> | <b>60</b> | <b>93</b>  |

### Jackknifed classification matrix

|              | 3T3/NIH   | CT-26     | CT-26-F1  | CT-26-FL3 | HCT116    | HT-29     | LoVo      | %correct   |
|--------------|-----------|-----------|-----------|-----------|-----------|-----------|-----------|------------|
| 3T3/NIH      | 40        | 0         | 0         | 0         | 0         | 0         | 0         | <b>100</b> |
| CT-26        | 0         | 39        | 0         | 0         | 1         | 0         | 0         | <b>98</b>  |
| CT-26-F1     | 0         | 0         | 33        | 7         | 0         | 0         | 0         | <b>83</b>  |
| CT-26-FL3    | 0         | 0         | 2         | 37        | 0         | 0         | 1         | <b>93</b>  |
| HCT116       | 0         | 9         | 5         | 0         | 65        | 1         | 0         | <b>81</b>  |
| HT-29        | 0         | 0         | 0         | 1         | 0         | 39        | 0         | <b>98</b>  |
| LoVo         | 0         | 0         | 0         | 0         | 0         | 0         | 60        | <b>100</b> |
| <b>Total</b> | <b>40</b> | <b>48</b> | <b>40</b> | <b>45</b> | <b>66</b> | <b>40</b> | <b>61</b> | <b>92</b>  |

### Eigenvalues

|       |       |       |       |
|-------|-------|-------|-------|
| 8.996 | 5.183 | 1.833 | 0.681 |
|-------|-------|-------|-------|

### Canonical correlations

|       |       |       |       |
|-------|-------|-------|-------|
| 0.949 | 0.916 | 0.804 | 0.636 |
|-------|-------|-------|-------|

### Cumulative proportion of total dispersion

|       |       |       |   |
|-------|-------|-------|---|
| 0.539 | 0.849 | 0.959 | 1 |
|-------|-------|-------|---|

### Wilks' lambda

lambda = 0.003

Approx.F= 196.949 df= 24, 1152 p-tail = 0

### Pillai's trace

trace = 2.79

Approx.F= 128.027 df= 24, 1332 p-tail = 0

### Lawley-Hotelling trace

trace = 16.693

Approx.F= 228.49 df= 24, 1314 p-tail = 0

### Canonical discriminant functions

|          | 1       | 2      | 3      | 4       |
|----------|---------|--------|--------|---------|
| Constant | 10.124  | 1.053  | -3.704 | -10.949 |
| VAR00002 | 3.478   | 10.714 | 7.071  | 2.339   |
| VAR00003 | -13.157 | 3.309  | -7.551 | 2.9     |
| VAR00004 | 3.341   | -3.312 | -0.268 | 10.893  |
| VAR00005 | -9.675  | -9.832 | 5.203  | -1.704  |

### Canonical discriminant functions -- standardized by within variances

|          | 1      | 2      | 3      | 4      |
|----------|--------|--------|--------|--------|
| VAR00002 | 0.31   | 0.956  | 0.631  | 0.209  |
| VAR00003 | -0.873 | 0.22   | -0.501 | 0.192  |
| VAR00004 | 0.286  | -0.283 | -0.023 | 0.931  |
| VAR00005 | -0.778 | -0.79  | 0.418  | -0.137 |

### Canonical scores of group means

|           | 1      | 2      | 3      | 4      |
|-----------|--------|--------|--------|--------|
| 3T3/NIH   | -3.429 | 3.617  | 1.008  | -1.098 |
| CT-26     | -4.052 | -2.21  | -1.302 | 1.095  |
| CT-26-F1  | 1.86   | -1.493 | 2.207  | 0.365  |
| CT-26-FL3 | 2.267  | 0.67   | 1.667  | 0.939  |
| HCT116    | -1.548 | -2.141 | -0.049 | -0.702 |
| HT-29     | -0.584 | 3.651  | -1.228 | 0.911  |
| LoVo      | 4.689  | 0.031  | -1.503 | -0.537 |

## Analysis layer 1: Discriminate cell lines grouped by class (cancerous, metastatic and healthy)

### Group Frequencies

|           |            |         |
|-----------|------------|---------|
| cancerous | metastatic | healthy |
| 160       | 140        | 40      |

### Group means

|          | cancerous | metastatic | healthy |
|----------|-----------|------------|---------|
| VAR00002 | 0.615     | 0.61       | 0.947   |
| VAR00003 | 0.697     | 0.434      | 0.819   |
| VAR00004 | 0.827     | 0.873      | 0.614   |
| VAR00005 | 0.805     | 0.647      | 0.839   |

### Between groups F-matrix -- df = 4 334

|            | cancerous | metastatic | healthy |
|------------|-----------|------------|---------|
| cancerous  | 0         |            |         |
| metastatic | 299.854   | 0          |         |
| healthy    | 110.096   | 329.356    | 0       |

### Wilks' lambda

|            |          |              |          |
|------------|----------|--------------|----------|
| Lambda =   | 0.0883   | df = 4 2 337 |          |
| Approx. F= | 197.5482 | df = 8 668   | prob = 0 |

### Classification functions

|          | cancerous | metastatic | healthy |
|----------|-----------|------------|---------|
| CONSTANT | -57.659   | -46.876    | -59.767 |
| VAR00002 | -4.024    | 11.007     | 10.079  |
| VAR00003 | 67.294    | 20.143     | 82.162  |
| VAR00004 | 58.979    | 82.153     | 25.13   |
| VAR00005 | 24.711    | 6.78       | 29.857  |

| Included |             |           | Excluded |            |           |
|----------|-------------|-----------|----------|------------|-----------|
| Variable | F-to-remove | Tolerance | Variable | F-to-enter | Tolerance |
| VAR00002 | 94.91       | 0.72245   |          |            |           |
| VAR00003 | 404.85      | 0.708488  |          |            |           |
| VAR00004 | 139.1       | 0.793274  |          |            |           |
| VAR00005 | 71.01       | 0.725508  |          |            |           |

### Classification matrix (cases in row categories classified into columns)

|              | cancerous  | meta       | healthy   | %correct  |
|--------------|------------|------------|-----------|-----------|
| cancerous    | 152        | 7          | 1         | 95        |
| metastatic   | 0          | 140        | 0         | 100       |
| healthy      | 0          | 0          | 40        | 100       |
| <b>Total</b> | <b>152</b> | <b>147</b> | <b>41</b> | <b>98</b> |

### Jackknifed classification matrix

|              | cancerous  | meta       | healthy   | %correct  |
|--------------|------------|------------|-----------|-----------|
| cancerous    | 150        | 8          | 2         | 94        |
| metastatic   | 0          | 140        | 0         | 100       |
| healthy      | 0          | 0          | 40        | 100       |
| <b>Total</b> | <b>150</b> | <b>148</b> | <b>42</b> | <b>97</b> |

### Eigenvalues

5.207      0.825

### Canonical correlations

0.916      0.672

### Cumulative proportion of total dispersion

0.863      1

### Wilks' lambda

Lambda = 0.088  
Approx.F= 197.548      df = 8, 668      p-tail = 0

### Pillai's trace

trace = 1.291  
Approx.F= 152.493      df = 8, 670      p-tail = 0

### Lawley-Hotelling trace

trace = 6.032  
Approx.F= 251.098      df = 8, 666      p-tail = 0

### Canonical discriminant functions

|          | 1       | 2      |
|----------|---------|--------|
| Constant | 2.144   | 4.008  |
| VAR00002 | 1.853   | 6.737  |
| VAR00003 | -10.903 | -4.402 |
| VAR00004 | 7.645   | -5.349 |
| VAR00005 | -4.102  | -1.818 |

### Canonical discriminant functions -- standardized by within variances

|          | 1      | 2      |
|----------|--------|--------|
| VAR00002 | 0.271  | 0.986  |
| VAR00003 | -1.046 | -0.422 |
| VAR00004 | 0.735  | -0.514 |
| VAR00005 | -0.666 | -0.295 |

### Canonical scores of group means

|            | 1      | 2      |
|------------|--------|--------|
| cancerous  | -1.294 | -0.809 |
| metastatic | 2.558  | 0.363  |
| healthy    | -3.778 | 1.968  |

### Analysis layer 2: Discrimination within grouped cancerous/non-metastatic cell lines (CT-26, HCT116 and HT-29)

#### Group Frequencies

| CT-26 | HCT116 | HT-29 |
|-------|--------|-------|
| 40    | 80     | 40    |

#### Group means

|          | CT-26 | HCT116 | HT-29 |
|----------|-------|--------|-------|
| VAR00002 | 0.56  | 0.554  | 0.789 |
| VAR00003 | 0.795 | 0.601  | 0.791 |
| VAR00004 | 0.915 | 0.797  | 0.801 |
| VAR00005 | 0.901 | 0.863  | 0.592 |

#### Between groups F-matrix -- df = 4 154

|        | CT-26  | HCT116  | HT-29 |
|--------|--------|---------|-------|
| CT-26  | 0      |         |       |
| HCT116 | 60.673 | 0       |       |
| HT-29  | 258.48 | 245.509 | 0     |

#### Wilks' lambda

|            |          |              |          |
|------------|----------|--------------|----------|
| Lambda =   | 0.0468   | df = 4 2 157 |          |
| Approx. F= | 139.3791 | df = 8 308   | prob = 0 |

### Classification functions

|          | CT-26    | HCT116   | HT-29    |
|----------|----------|----------|----------|
| CONSTANT | -157.365 | -117.263 | -122.438 |
| VAR00002 | -31      | -7.95    | 79.89    |
| VAR00003 | 140.045  | 105.125  | 109.769  |
| VAR00004 | 106.948  | 89.619   | 72.31    |
| VAR00005 | 133.929  | 118.357  | 58.914   |

| <b>Included</b> |             |           | <b>Excluded</b> |            |           |
|-----------------|-------------|-----------|-----------------|------------|-----------|
| Variable        | F-to-remove | Tolerance | Variable        | F-to-enter | Tolerance |
| VAR00002        | 150.93      | 0.684638  |                 |            |           |
| VAR00003        | 64.26       | 0.870438  |                 |            |           |
| VAR00004        | 14.02       | 0.87492   |                 |            |           |
| VAR00005        | 101.13      | 0.76337   |                 |            |           |

### Classification matrix (cases in row categories classified into columns)

|              | CT-26     | HCT116    | HT-29     | %correct   |
|--------------|-----------|-----------|-----------|------------|
| CT-26        | 39        | 1         | 0         | <b>98</b>  |
| HCT116       | 8         | 72        | 0         | <b>90</b>  |
| HT-29        | 0         | 0         | 40        | <b>100</b> |
| <b>Total</b> | <b>47</b> | <b>73</b> | <b>40</b> | <b>94</b>  |

### Jackknifed classification matrix

|              | CT-26     | HCT116    | HT-29     | %correct   |
|--------------|-----------|-----------|-----------|------------|
| CT-26        | 39        | 1         | 0         | <b>98</b>  |
| HCT116       | 9         | 71        | 0         | <b>89</b>  |
| HT-29        | 0         | 0         | 40        | <b>100</b> |
| <b>Total</b> | <b>48</b> | <b>72</b> | <b>40</b> | <b>94</b>  |

### Eigenvalues

7.931      1.39

### Canonical correlations

0.942      0.763

### Cumulative proportion of total dispersion

0.851      1

### Wilks' lambda

Lambda = 0.047

Approx.F= 139.379

df = 8, 308

p-tail = 0



### Pillai's trace

trace = 1.47  
Approx.F= 107.376                      df = 8, 310                      p-tail = 0

### Lawley-Hotelling trace

trace = 9.321  
Approx.F= 178.273                      df = 8, 306                      p-tail = 0

### Canonical discriminant functions

|          | 1       | 2       |
|----------|---------|---------|
| Constant | 3.56    | 11.684  |
| VAR00002 | 15.183  | 1.972   |
| VAR00003 | -1.932  | -11.595 |
| VAR00004 | -3.959  | -4.528  |
| VAR00005 | -10.273 | -1.326  |

### Canonical discriminant functions -- standardized by within variances

|          | 1      | 2      |
|----------|--------|--------|
| VAR00002 | 1.038  | 0.135  |
| VAR00003 | -0.155 | -0.928 |
| VAR00004 | -0.327 | -0.374 |
| VAR00005 | -0.91  | -0.117 |

### Canonical scores of group means

|        | 1      | 2      |
|--------|--------|--------|
| CT-26  | -2.356 | -1.766 |
| HCT116 | -1.204 | 1.054  |
| HT-29  | 4.763  | -0.341 |

## Analysis layer 2: Discrimination within grouped cancerous/metastatic cell lines (CT-26-F1m CT-26-FL3 and LoVo)

### Group Frequencies

| CT-26-F1 | CT-26-FL3 | LoVo |
|----------|-----------|------|
| 40       | 40        | 60   |

### Group means

|          | CT-26-F1 | CT-26-FL3 | LoVo  |
|----------|----------|-----------|-------|
| VAR00002 | 0.693    | 0.773     | 0.446 |
| VAR00003 | 0.419    | 0.489     | 0.408 |
| VAR00004 | 0.911    | 0.911     | 0.822 |

VAR00005      0.849      0.739      0.451

**Between groups F-matrix -- df = 4 134**

|           | CT-26-F1 | CT-26-FL3 | LoVo |
|-----------|----------|-----------|------|
| CT-26-F1  | 0        |           |      |
| CT-26-FL3 | 37.349   | 0         |      |
| LoVo      | 189.756  | 106.889   | 0    |

**Wilks' lambda**

Lambda = 0.079      df = 4 2 137  
 Approx. F= 85.6963      df = 8 268      prob = 0

**Classification functions**

|          | CT-26-F1 | CT-26-FL3 | LoVo    |
|----------|----------|-----------|---------|
| CONSTANT | -211.591 | -202.242  | -139.21 |
| VAR00002 | -59.623  | -36.404   | -35.736 |
| VAR00003 | 197.378  | 214.085   | 184.7   |
| VAR00004 | 227.164  | 226.566   | 201.511 |
| VAR00005 | 203.546  | 161.453   | 113.474 |

| <b>Included</b> |             |           | <b>Excluded</b> |            |           |
|-----------------|-------------|-----------|-----------------|------------|-----------|
| Variable        | F-to-remove | Tolerance | Variable        | F-to-enter | Tolerance |
| VAR00002        | 22.4        | 0.494287  |                 |            |           |
| VAR00003        | 10.52       | 0.909455  |                 |            |           |
| VAR00004        | 8.88        | 0.986348  |                 |            |           |
| VAR00005        | 159.72      | 0.522001  |                 |            |           |

**Classification matrix (cases in row categories classified into columns)**

|              | CT-26-F1  | CT-26-FL3 | LoVo      | %correct   |
|--------------|-----------|-----------|-----------|------------|
| CT-26-F1     | 35        | 5         | 0         | <b>88</b>  |
| CT-26-FL3    | 2         | 38        | 0         | <b>95</b>  |
| LoVo         | 0         | 0         | 60        | <b>100</b> |
| <b>Total</b> | <b>37</b> | <b>43</b> | <b>60</b> | <b>95</b>  |

**Jackknifed classification matrix**

|              | CT-26-F1  | CT-26-FL3 | LoVo      | %correct  |
|--------------|-----------|-----------|-----------|-----------|
| CT-26-F1     | 33        | 7         | 0         | <b>83</b> |
| CT-26-FL3    | 3         | 37        | 0         | <b>93</b> |
| LoVo         | 0         | 1         | 59        | <b>98</b> |
| <b>Total</b> | <b>36</b> | <b>45</b> | <b>59</b> | <b>92</b> |

### Eigenvalues

|       |       |
|-------|-------|
| 6.205 | 0.757 |
|-------|-------|

### Canonical correlations

|       |       |
|-------|-------|
| 0.928 | 0.656 |
|-------|-------|

### Cumulative proportion of total dispersion

|       |   |
|-------|---|
| 0.891 | 1 |
|-------|---|

### Wilks' lambda

Lambda = 0.079

Approx.F= 85.696 df= 8, 268 p-tail = 0

### Pillai's trace

trace = 1.292

Approx.F= 61.602 df= 8, 270 p-tail = 0

### Lawley-Hotelling trace

trace = 6.962

Approx.F= 115.746 df= 8, 266 p-tail = 0

### Canonical discriminant functions

|          | 1       | 2      |
|----------|---------|--------|
| Constant | 13.53   | -7.397 |
| VAR00002 | 3.296   | 8.046  |
| VAR00003 | -3.426  | 10.19  |
| VAR00004 | -4.945  | 3.482  |
| VAR00005 | -15.054 | -7.696 |

### Canonical discriminant functions -- standardized by within variances

|          | 1      | 2      |
|----------|--------|--------|
| VAR00002 | 0.384  | 0.939  |
| VAR00003 | -0.179 | 0.531  |
| VAR00004 | -0.332 | 0.234  |
| VAR00005 | -1.177 | -0.602 |

### Canonical scores of group means

|           | 1      | 2      |
|-----------|--------|--------|
| CT-26-F1  | -2.898 | -0.91  |
| CT-26-FL3 | -1.227 | 1.292  |
| LoVo      | 2.75   | -0.255 |

## References

1. K. L. Bicker, J. Sun, J. J. Lavigne and P. R. Thompson, *ACS Comi. Sci.*, 2011, **13**, 232-243.
2. *GraFit*, Erithacus Software Limited, Version 5.0.11 edn., 2004, pp. Note that when the data were fit to a two-site binding model no significant differences in the calculated Kd values were apparent,  $Kd1 = 0.47 \pm 40.51 \mu\text{M}$  and  $Kd42 = 43.47 \pm 41.40 \mu\text{M}$ . However, the errors are quite large for this later analysis while the single site model afforded a significantly better fit to the data.
3. N. J. Moerke, *Curr. Protoc. Chem. Biol.*, 2009, **1**, 1-15.
4. , Systat Software, Inc, Version 11.00.01 edn., 2004.
5. , StatSoft, Inc, 6.1 edn., 2003.
